# Supplementary material
Source: PubMed Central journal article supplement (PMC6454497)
Supplement: nqy093_supplemental_tables_and_figure.pdf [file nqy093_supplemental_tables_and_figure.pdf]

Supplemental Figure 1. Participant flow chart

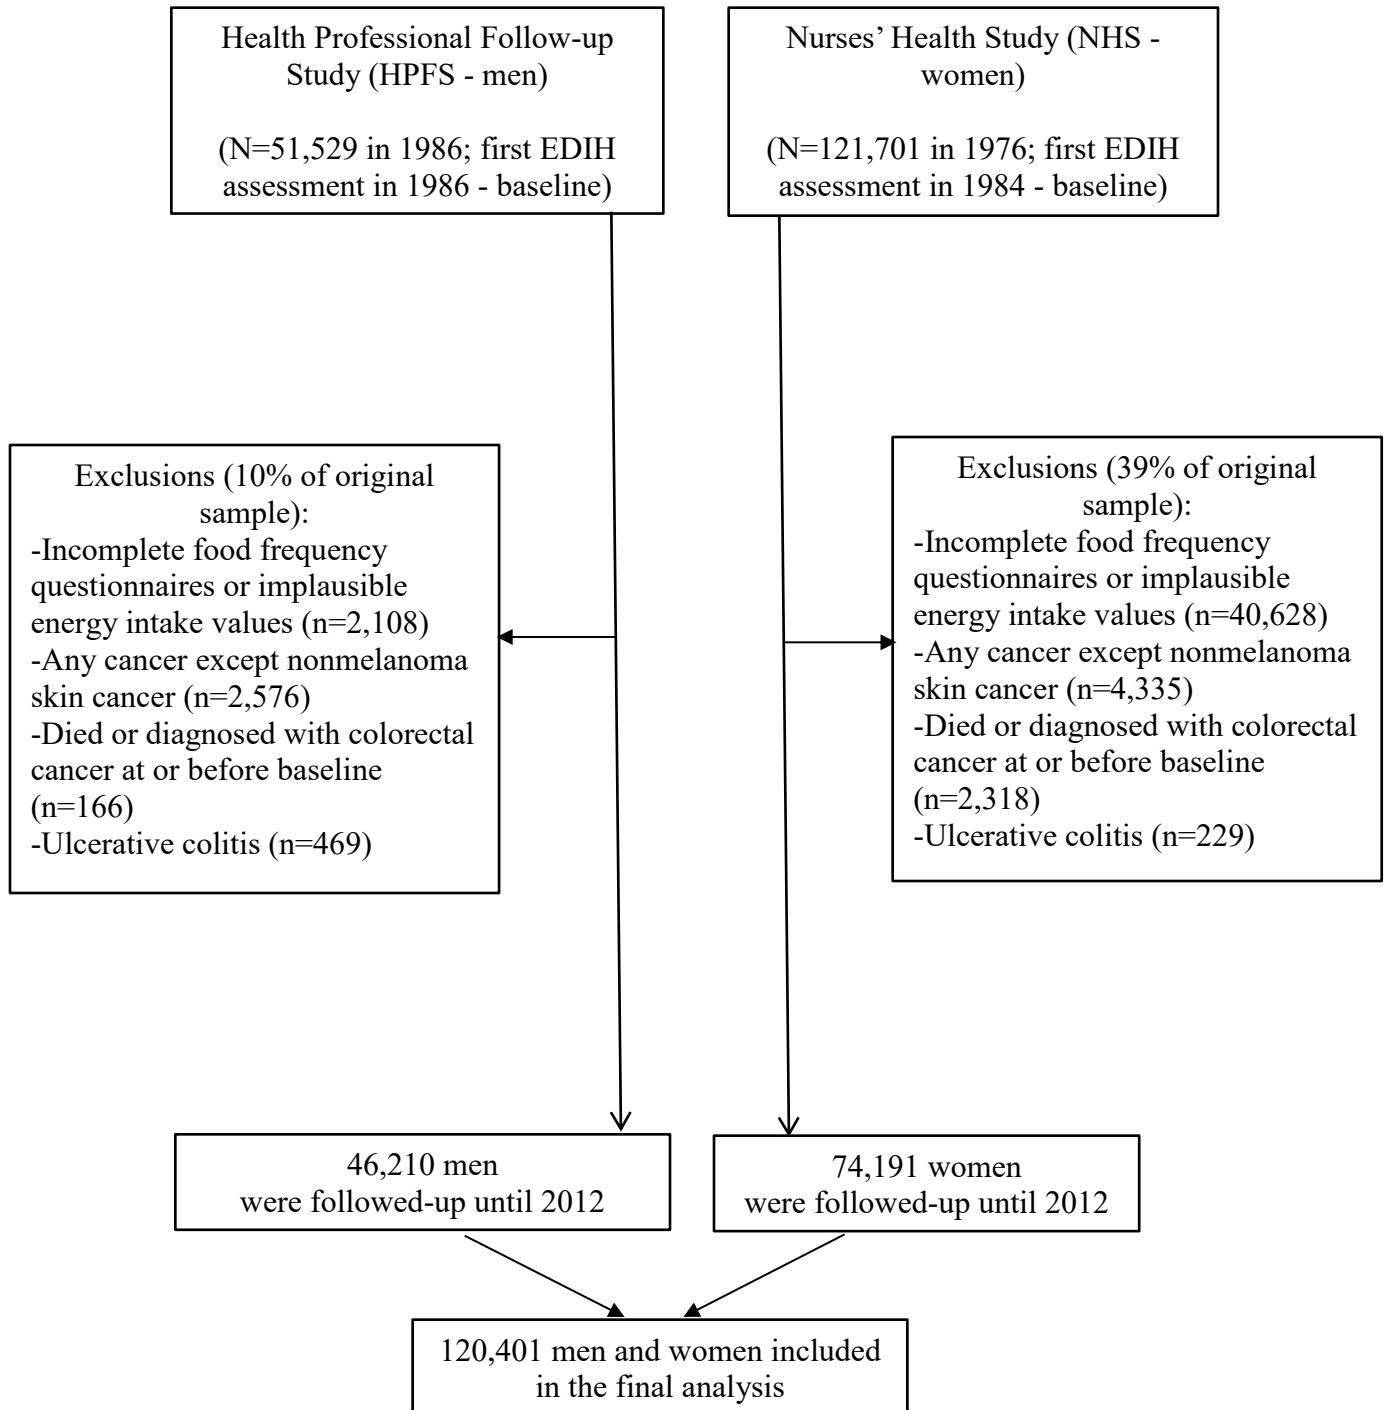

Online Supporting Material

Supplemental Table 1. Distribution of characteristics (weighted by person-years) among the **excluded participants**, in quintiles of the empirical dietary index for hyperinsulinemia (EDIH) score in the NHS (1984-2012) and the HPFS (1986-2012)<sup>1,2</sup>

| Characteristic                                | Nurses' Health Study (women)<br>n=47,570 |             |             | Health Professionals Follow-up Study (men)<br>n=5,319 |             |             |
|-----------------------------------------------|------------------------------------------|-------------|-------------|-------------------------------------------------------|-------------|-------------|
|                                               | Quintile 1                               | Quintile 3  | Quintile 5  | Quintile 1                                            | Quintile 3  | Quintile 5  |
| Median EDIH score                             | -1.14                                    | -0.02       | 1.18        | -1.06                                                 | -0.03       | 1.04        |
| Age, years                                    | 56.7 ± 6.2 <sup>3</sup>                  | 55.8 ± 6.6  | 54.4 ± 7.1  | 82.1 ± 10.0                                           | 80.9 ± 9.8  | 78.6 ± 10.1 |
| Alcohol drinkers, %                           | 75.2                                     | 63.8        | 53.3        | 68.1                                                  | 61.9        | 48.0        |
| Total alcohol, drinks/week, among drinkers    | 7.7 ± 8.1                                | 4.9 ± 6.5   | 5.2 ± 6.9   | 10.0 ± 10.2                                           | 7.0 ± 7.1   | 6.5 ± 7.8   |
| Current smoker, %                             | 20.8                                     | 22.9        | 24.3        | 0.6                                                   | 0.2         | 1.3         |
| Regular aspirin use, yes, %                   | 69.2                                     | 70.0        | 64.7        | 40.7                                                  | 38.8        | 40.2        |
| Family history of colorectal cancer, yes, %   | 20.9                                     | 17.8        | 18.3        | 3.7                                                   | 6.6         | 4.9         |
| History of endoscopy, yes, %                  | 4.9                                      | 4.6         | 5.1         | 18.2                                                  | 18.8        | 16.5        |
| Multivitamin use, yes, %                      | 46.7                                     | 43.3        | 40.7        | 52.9                                                  | 53.9        | 50.8        |
| Diabetes, yes, %                              | 0.9                                      | 2.1         | 5.2         | 6.9                                                   | 10.1        | 16.3        |
| Total energy intake, Kcal/d                   | 1846 ± 490                               | 1651 ± 467  | 1827 ± 513  | 2221 ± 595                                            | 1842 ± 590  | 2118 ± 729  |
| Dietary fiber, g/d                            | 19.1 ± 2.0                               | 18.1 ± 5.3  | 16.8 ± 5.0  | 28.1 ± 9.3                                            | 24.2 ± 7.4  | 21.1 ± 6.5  |
| Dietary calcium, mg/d                         | 734 ± 243                                | 732 ± 262   | 687 ± 250   | 920 ± 342                                             | 908 ± 348   | 836 ± 350   |
| Vitamin D, IU/d                               | 205 ± 112                                | 213 ± 117   | 199 ± 117   | 266 ± 153                                             | 267 ± 145   | 251 ± 149   |
| Whole grains, g/d                             | 17.5 ± 17.0                              | 15.5 ± 13.3 | 12.5 ± 12.7 | 37.8 ± 26.5                                           | 32.8 ± 21.4 | 27.0 ± 21.1 |
| Physical activity, MET-hour/week              | 16.4 ± 20.1                              | 13.5 ± 15.9 | 12.1 ± 15.3 | 38.9 ± 29.9                                           | 34.0 ± 24.4 | 33.9 ± 21.1 |
| ≥Median physical activity <sup>5</sup> , %    | 49.5                                     | 42.8        | 41.8        | 80.1                                                  | 73.2        | 75.8        |
| Body mass index, kg/m <sup>2</sup>            | 24.2 ± 3.6                               | 25.2 ± 4.1  | 26.5 ± 5.3  | 24.7 ± 3.3                                            | 25.8 ± 3.7  | 27.5 ± 4.4  |
| Overweight or obese, ≥25kg/m <sup>2</sup> , % | 41.6                                     | 53.3        | 63.3        | 0.6                                                   | 2.2         | 1.3         |
| Postmenopausal, %                             | 76.7                                     | 74.6        | 67.5        | NA                                                    | NA          | NA          |
| Hormone therapy use ever <sup>4</sup> , %     | 49.1                                     | 48.2        | 48.7        | NA                                                    | NA          | NA          |

<sup>1</sup>Weighted by follow-up time (person-years) accrued by each participant. NA=not applicable

<sup>2</sup>EDIH scores were adjusted for energy intake using the residual method. Lower EDIH scores indicate insulin sensitive diets, and higher scores indicate hyperinsulinemic diets.

<sup>3</sup>Mean ± SD (all such values)

<sup>4</sup>Among postmenopausal women

<sup>5</sup>Median physical activity was 35.6 MET-hour/week in men and 14.1 MET-hour/week in women

Supplemental Table 2. Minimally adjusted hazard ratios and 95% confidence intervals for colorectal cancer risk in quintiles of the empirical dietary index for hyperinsulinemia (EDIH) scores among men and women<sup>1,2,3</sup>

|                              | Quintile 1<br>(reference) | Quintile 2        | Quintile 3        | Quintile 4        | Quintile 5        | P-trend <sup>4</sup> |
|------------------------------|---------------------------|-------------------|-------------------|-------------------|-------------------|----------------------|
| <b>Colorectal cancer</b>     |                           |                   |                   |                   |                   |                      |
| Men, cases/person-years      | 254/189664                | 234/190395        | 272/190593        | 249/190635        | 235/189983        |                      |
| Men, HR (95%CI)              | 1.00                      | 0.94 (0.79, 1.13) | 1.16 (0.97, 1.38) | 1.13 (0.94, 1.35) | 1.29 (1.07, 1.55) | 0.001                |
| Women, cases/person-years    | 298/320941                | 291/321026        | 294/321112        | 280/321696        | 276/322426        |                      |
| Women, HR (95%CI)            | 1.00                      | 1.01 (0.85, 1.19) | 1.07 (0.91, 1.26) | 1.13 (0.95, 1.33) | 1.30 (1.10, 1.54) | 0.001                |
| <b>Colon cancer</b>          |                           |                   |                   |                   |                   |                      |
| Men, cases (n=984)           | 207                       | 187               | 213               | 198               | 179               |                      |
| Men, HR (95%CI)              | 1.00                      | 0.92 (0.76, 1.13) | 1.11 (0.91, 1.35) | 1.11 (0.91, 1.35) | 1.22 (0.99, 1.50) | 0.02                 |
| Women, cases (n=1129)        | 229                       | 226               | 227               | 219               | 228               |                      |
| Women, HR (95%CI)            | 1.00                      | 1.00 (0.83, 1.20) | 1.06 (0.88, 1.28) | 1.14 (0.94, 1.37) | 1.40 (1.15, 1.69) | 0.0003               |
| <b>Proximal colon cancer</b> |                           |                   |                   |                   |                   |                      |
| Men, cases (n=424)           | 94                        | 86                | 85                | 83                | 76                |                      |
| Men, HR (95%CI)              | 1.00                      | 0.91 (0.67, 1.22) | 0.96 (0.72, 1.30) | 1.02 (0.75, 1.37) | 1.10 (0.81, 1.51) | 0.43                 |
| Women, cases (n=714)         | 148                       | 146               | 144               | 144               | 132               |                      |
| Women, HR (95%CI)            | 1.00                      | 1.01 (0.80, 1.28) | 1.06 (0.84, 1.34) | 1.20 (0.95, 1.52) | 1.33 (1.04, 1.70) | 0.009                |
| <b>Distal colon cancer</b>   |                           |                   |                   |                   |                   |                      |
| Men, cases (n=354)           | 66                        | 60                | 90                | 71                | 67                |                      |
| Men, HR (95%CI)              | 1.00                      | 0.99 (0.69, 1.41) | 1.56 (1.13, 2.16) | 1.30 (0.92, 1.83) | 1.55 (1.09, 2.20) | 0.004                |
| Women, cases (n=387)         | 71                        | 75                | 81                | 70                | 90                |                      |
| Women, HR (95%CI)            | 1.00                      | 1.04 (0.75, 1.44) | 1.17 (0.85, 1.62) | 1.10 (0.78, 1.54) | 1.58 (1.14, 2.19) | 0.006                |

## Online Supporting Material

### Rectal cancer

|                      |      |                   |                   |                   |                   |      |
|----------------------|------|-------------------|-------------------|-------------------|-------------------|------|
| Men, cases (n=260)   | 47   | 47                | 59                | 51                | 56                |      |
| Men, HR (95%CI)      | 1.00 | 1.02 (0.68, 1.54) | 1.36 (0.92, 2.01) | 1.22 (0.82, 1.83) | 1.60 (1.07, 2.38) | 0.01 |
| Women, cases (n=310) | 69   | 65                | 67                | 61                | 48                |      |
| Women, HR (95%CI)    | 1.00 | 1.03 (0.73, 1.45) | 1.12 (0.79, 1.58) | 1.09 (0.76, 1.55) | 0.96 (0.66, 1.41) | 0.99 |

<sup>1</sup>EDIH scores were adjusted for total energy intake using the residual method prior to analyses. In EDIH quintiles, lower scores indicate insulin sensitive diets, and higher scores indicate hyperinsulinemic diets.

<sup>2</sup>Heterogeneity for risk by anatomic subsite was tested using Duplication method cause-specific Cox models ( $P$ -heterogeneity=0.53 among men and 0.48 among women).

<sup>3</sup>HR (95% CI) from Cox models were adjusted for age, alcohol intake and calendar year of the current questionnaire.

<sup>4</sup>The p-value for linear trend across EDIH quintiles was the p-value of the ordinal variable constructed by assigning quintile medians to all participants in the quintile. Cox models for linear trend were adjusted for all covariates listed in footnote #2

Supplemental Table 3. Multivariable-adjusted associations between the empirical dietary index for hyperinsulinemia (EDIH) score and CRC risk additionally adjusted for BMI and diabetes in men and women<sup>1,2,3</sup>

|                                          | Quintile 1<br>(reference) | Quintile 2        | Quintile 3        | Quintile 4        | Quintile 5        | P-trend <sup>4</sup> |
|------------------------------------------|---------------------------|-------------------|-------------------|-------------------|-------------------|----------------------|
| <b>Colorectal cancer among men</b>       |                           |                   |                   |                   |                   |                      |
| BMI                                      | 1.00                      | 0.94 (0.78, 1.12) | 1.14 (0.96, 1.36) | 1.11 (0.93, 1.33) | 1.31 (1.09, 1.58) | 0.001                |
| Diabetes                                 | 1.00                      | 0.94 (0.78, 1.12) | 1.14 (0.95, 1.36) | 1.10 (0.92, 1.32) | 1.29 (1.07, 1.56) | 0.002                |
| <b>Colorectal cancer among women</b>     |                           |                   |                   |                   |                   |                      |
| BMI                                      | 1.00                      | 0.99 (0.84, 1.16) | 1.04 (0.88, 1.23) | 1.07 (0.90, 1.26) | 1.19 (1.00, 1.42) | 0.04                 |
| Diabetes                                 | 1.00                      | 0.99 (0.84, 1.17) | 1.05 (0.89, 1.24) | 1.08 (0.91, 1.28) | 1.21 (1.02, 1.44) | 0.02                 |
| <b>Colon cancer among men</b>            |                           |                   |                   |                   |                   |                      |
| BMI                                      | 1.00                      | 0.92 (0.75, 1.13) | 1.10 (0.90, 1.33) | 1.10 (0.90, 1.34) | 1.24 (1.01, 1.53) | 0.01                 |
| Diabetes                                 | 1.00                      | 0.92 (0.75, 1.13) | 1.09 (0.90, 1.33) | 1.09 (0.89, 1.33) | 1.22 (0.99, 1.51) | 0.02                 |
| <b>Colon cancer among women</b>          |                           |                   |                   |                   |                   |                      |
| BMI                                      | 1.00                      | 0.98 (0.82, 1.19) | 1.03 (0.85, 1.24) | 1.08 (0.89, 1.31) | 1.30 (1.07, 1.58) | 0.006                |
| Diabetes                                 | 1.00                      | 0.99 (0.82, 1.19) | 1.03 (0.86, 1.25) | 1.09 (0.90, 1.32) | 1.31 (1.08, 1.59) | 0.004                |
| <b>Proximal colon cancer among men</b>   |                           |                   |                   |                   |                   |                      |
| BMI                                      | 1.00                      | 0.90 (0.67, 1.22) | 0.95 (0.70, 1.28) | 1.00 (0.74, 1.36) | 1.15 (0.84, 1.57) | 0.34                 |
| Diabetes                                 | 1.00                      | 0.90 (0.67, 1.22) | 0.94 (0.70, 1.27) | 1.00 (0.74, 1.35) | 1.13 (0.82, 1.54) | 0.39                 |
| <b>Proximal colon cancer among women</b> |                           |                   |                   |                   |                   |                      |
| BMI                                      | 1.00                      | 1.00 (0.79, 1.26) | 1.04 (0.82, 1.32) | 1.16 (0.91, 1.47) | 1.26 (0.98, 1.62) | 0.04                 |
| Diabetes                                 | 1.00                      | 1.00 (0.79, 1.26) | 1.04 (0.82, 1.32) | 1.16 (0.91, 1.47) | 1.26 (0.98, 1.62) | 0.04                 |
| <b>Distal colon cancer among men</b>     |                           |                   |                   |                   |                   |                      |
| BMI                                      | 1.00                      | 0.97 (0.68, 1.39) | 1.54 (1.11, 2.14) | 1.26 (0.89, 1.78) | 1.57 (1.10, 2.24) | 0.005                |

## Online Supporting Material

|                                        |      |                   |                   |                   |                   |       |
|----------------------------------------|------|-------------------|-------------------|-------------------|-------------------|-------|
| Diabetes                               | 1.00 | 0.97 (0.68, 1.39) | 1.56 (1.12, 2.16) | 1.27 (0.90, 1.80) | 1.61 (1.13, 2.30) | 0.003 |
| <b>Distal colon cancer among women</b> |      |                   |                   |                   |                   |       |
| BMI                                    | 1.00 | 1.02 (0.73, 1.42) | 1.12 (0.81, 1.55) | 1.01 (0.72, 1.43) | 1.41 (1.01, 1.97) | 0.05  |
| Diabetes                               | 1.00 | 1.03 (0.74, 1.43) | 1.14 (0.82, 1.58) | 1.04 (0.74, 1.46) | 1.46 (1.05, 2.03) | 0.03  |
| <b>Rectal cancer among men</b>         |      |                   |                   |                   |                   |       |
| BMI                                    | 1.00 | 1.00 (0.66, 1.51) | 1.34 (0.91, 1.99) | 1.17 (0.78, 1.76) | 1.61 (1.07, 2.41) | 0.02  |
| Diabetes                               | 1.00 | 1.00 (0.66, 1.50) | 1.33 (0.90, 1.98) | 1.16 (0.77, 1.74) | 1.58 (1.05, 2.36) | 0.02  |
| <b>Rectal cancer among women</b>       |      |                   |                   |                   |                   |       |
| BMI                                    | 1.00 | 0.99 (0.70, 1.40) | 1.07 (0.76, 1.51) | 1.00 (0.70, 1.43) | 0.83 (0.56, 1.23) | 0.42  |
| Diabetes                               | 1.00 | 1.00 (0.71, 1.42) | 1.10 (0.78, 1.55) | 1.04 (0.73, 1.48) | 0.88 (0.60, 1.30) | 0.65  |

<sup>1</sup>NSAIDs=non-steroidal anti-inflammatory drugs. Values are hazards ratios (95% confidence intervals)

<sup>2</sup>EDIH scores were adjusted for total energy intake using the residual method. In EDIH quintiles, lower scores indicate insulin sensitive diets, and higher scores indicate hyperinsulinemic diets.

<sup>3</sup>Cox models were adjusted for race, family history of cancer, history of endoscopy, multivitamin use, total alcohol intake, physical activity, pack-years of smoking, regular aspirin use, regular NSAIDs use, and additionally for menopausal status, and postmenopausal hormone use in women.

<sup>4</sup>The p-value for linear trend across EDIH quintiles was the p-value of the ordinal variable constructed by assigning quintile medians to all participants in the quintile. Cox models for linear trend were adjusted for all covariates listed in footnote #3.

Online Supporting Material

Supplemental Table 4. Hazard ratios of the association between the empirical dietary pattern for hyperinsulinemia score and colorectal cancer risk in combined categories of physical activity and body weight<sup>1,2</sup>

| Subgroups                                       | Quintiles of the empirical dietary pattern for hyperinsulinemia (EDIH) score |                   |                   |                   |                   | P-trend <sup>3</sup> |
|-------------------------------------------------|------------------------------------------------------------------------------|-------------------|-------------------|-------------------|-------------------|----------------------|
|                                                 | Quintile 1<br>(reference)                                                    | Quintile 2        | Quintile 3        | Quintile 4        | Quintile 5        |                      |
| <b>Men</b>                                      |                                                                              |                   |                   |                   |                   |                      |
| High activity and lean, n cases=296             | 1.00                                                                         | 0.60 (0.42, 0.87) | 0.79 (0.56, 1.12) | 0.92 (0.64, 1.32) | 0.99 (0.67, 1.45) | 0.84                 |
| High activity and overweight/obese, n cases=308 | 1.00                                                                         | 1.12 (0.77, 1.63) | 1.19 (0.82, 1.74) | 1.09 (0.74, 1.61) | 1.16 (0.79, 1.71) | 0.53                 |
| Low activity and lean, n cases=308              | 1.00                                                                         | 1.21 (0.84, 1.74) | 1.10 (0.75, 1.60) | 1.24 (0.84, 1.82) | 1.89 (1.30, 2.76) | 0.002                |
| Low activity and overweight/obese, n cases=330  | 1.00                                                                         | 0.98 (0.65, 1.48) | 1.49 (1.03, 2.17) | 1.27 (0.87, 1.86) | 1.45 (0.98, 2.15) | 0.03                 |
| <b>Women</b>                                    |                                                                              |                   |                   |                   |                   |                      |
| High activity and lean, n cases=265             | 1.00                                                                         | 0.98 (0.70, 1.37) | 0.89 (0.62, 1.29) | 1.29 (0.89, 1.87) | 0.80 (0.49, 1.30) | 0.88                 |
| High activity and overweight/obese, n cases=354 | 1.00                                                                         | 0.85 (0.61, 1.20) | 1.06 (0.76, 1.47) | 0.68 (0.47, 0.99) | 1.09 (0.78, 1.54) | 0.88                 |
| Low activity and lean, n cases=315              | 1.00                                                                         | 0.96 (0.67, 1.36) | 1.19 (0.84, 1.67) | 1.10 (0.76, 1.59) | 1.22 (0.83, 1.80) | 0.23                 |
| Low activity and overweight/obese, n cases=505  | 1.00                                                                         | 1.09 (0.79, 1.51) | 0.95 (0.69, 1.32) | 1.26 (0.93, 1.72) | 1.41 (1.03, 1.92) | 0.009                |

<sup>1</sup>Activity was classified based on the sex-specific physical activity median: at or above the median as active and below the median as sedentary (median physical activity was 24.8 MET-hours/week in men and 13.4 MET-hours/week in women). Body weight was classified based on BMI categories as follows: normal weight, <25 kg/m<sup>2</sup> and overweight/obese as ≥25 kg/m<sup>2</sup>. P-values for the 3-way interaction between the EDIH score, physical activity and BMI were 0.20 in men and 0.09 in women.

<sup>2</sup>All analyses were conducted using Cox models. Cox models for linear trend were adjusted for all covariates listed in footnote #2.
